# Supplementary material for: Whole-Genome Sequencing for Drug Resistance Profile Prediction in Mycobacterium tuberculosis
Source: PubMed Central journal article supplement (PMC6496161; doi:10.1128/aac.02175-18), 2019-03-27
Supplement: AAC.02175-18-s0001.pdf [file AAC.02175-18-s0001.pdf]

## 1 **Supplementary material**

### 2 **Supplementary text**

#### 3 **Culture conditions**

4 Strains were isolated from clinical material following established decontamination  
5 procedures. Bacteria were cultured in BD MGIT 960 tubes and Middlebrook 7H10 agar  
6 media. Strains collected as a part of the IeDEA study were cultured on Löwenstein-Jensen  
7 slants and sent to the National Center for Mycobacteria (University of Zürich, Zürich,  
8 Switzerland) for phenotypic drug susceptibility testing.

#### 9 **Phenotypic drug susceptibility testing – BD MGIT 960**

10 DST for first- and second-line anti-TB drugs was performed using the Becton Dickinson  
11 (BD) MGIT 960 and EpiCenter devices equipped with the TB eXiST module (BD, Franklin  
12 Lakes, NJ, USA) (1). The MGIT 960 system was used for primary bacterial isolation and  
13 DST for first-line drugs (rifampin, isoniazid, ethambutol, pyrazinamide) as recommended  
14 by the manufacturer, using currently established epidemiological cut-offs (ECOFF –  
15 epidemiological cut-off, i.e the highest observed wild-type MIC (2)) summarized in Table 1  
16 in the main text. MGIT tubes enriched with 0.8 ml of supplement (MGIT 960 OADC  
17 supplement; BD) were inoculated with 0.1 ml of the drug solution (supplementary Table 2)  
18 and 0.5 ml of the test strain suspension. For the drug-free growth control tube, the *M.*  
19 *tuberculosis* suspension was diluted 1:100 in sterile saline and 0.5 ml was inoculated into the  
20 tube (proportion testing).

#### 21 **Phenotypic drug susceptibility testing - Proportion method by 7H10 agar dilution**

22 *M. tuberculosis* strains were grown in Middlebrook 7H9 liquid broth with 10% OADC  
23 supplement (BD) until McFarland 0.5 was reached. Using a replicator micropipettor robot  
24 VIAFLOW96 (Integra Biosciences, Zizers, Switzerland), 1 µl of the culture suspension was  
25 inoculated onto Middlebrook 7H10 agar plates with twofold serially diluted drug  
26 concentrations to determine the MIC (supplementary Table 2), whereby the MIC is defined as  
27 the lowest drug concentration that inhibits growth of more than 99% the bacteria during  
28 21 days of incubation at 37°C (3). Agar plates were read automatically using an AID  
29 Microplate reader and automated software developed by AID (AID Diagnostika, Strassberg,  
30 Germany). 7H10 agar dilution MICs of the reference strains differed between the different

31 experimental runs by more than one dilution step for capreomycin, kanamycin A, amikacin  
32 and isoniazid. For these antibiotics, the MICs for all strains from the last run were rescaled by  
33 the differences observed for the reference strains. Phenotypic DST for all strains was  
34 performed at the Swiss National Center for Mycobacteria (University of Zürich, Zürich,  
35 Switzerland).

### 36 **Whole genome sequencing**

37 Libraries were prepared using the Illumina Nextera XT kit and sequenced on an Illumina  
38 HiSeq 2500, generating 125 bp paired-end reads. Sequencing was performed at the genomics  
39 facility of the ETHZ/University of Basel in Basel, Switzerland and at the Broad Institute,  
40 Cambridge, Massachusetts, United States.

41 The raw data was processed with an in-house python pipeline as follows: reads were adaptor  
42 clipped and quality trimmed with Trimmomatic (v.0.33), whereby resulting reads < 20 bp  
43 were discarded. Overlapping paired-end reads were merged using SeqPrep  
44 (<https://github.com/jstjohn/SeqPrep>). The processed reads were subsequently mapped to a  
45 reconstructed hypothetical MTBC ancestor (4) with BWA (v.0.7.12) (5). Duplicated reads  
46 were marked with Picard (v.2.1.1) (<https://github.com/broadinstitute/picard>) using the  
47 MarkDuplicates module. Local realignments of reads around indels were performed with the  
48 GATK (v.3.4.0) modules RealignerTargetCreator and IndelRealigner (6). Pileups were  
49 generated with Samtools (v.1.2) (7) and SNPs were subsequently called with VarScan  
50 (v.2.4.1) (8) using the following thresholds: minimum mapping & minimum base quality of  
51 20, minimum read depth of 7X at a given position. For a SNP to be called, the alternative  
52 base call needed to be supported by at least 5 reads without strand bias. Furthermore, SNPs  
53 were considered as fixed when they reached a frequency of  $\geq 90\%$ . The position was called  
54 as ancestral when the frequency was found to be < 10%. SNPs were annotated with SnpEff  
55 (v.4.11) (9) corresponding to the *M. tuberculosis* H37Rv reference annotation  
56 (NC\_000962.3). SNPs in regions that share a minimum of 50 bp of sequence identity with  
57 other regions in the genome were excluded (10).

### 58 **Variable SNP alignment and phylogenetic analysis**

59 A variable SNP alignment was generated by concatenating all filtered SNPs in the dataset,  
60 whereby the IUPAC nucleotide ambiguity codes were used for unfixed positions ( $10\% \leq$   
61 variant frequency < 90%). Positions were considered variable if at least one genome had

62 SNP-call at the position in question. If the SNP fell into an excluded region (see above) or  
63 was covered by less than 7 reads it was encoded as X in the alignment. If there was no  
64 sequence information at all available for a position, it was encoded as a gap. Furthermore,  
65 positions known to be involved in drug resistance were not considered in the alignment. The  
66 variable SNP alignment was used to infer a maximum likelihood phylogeny with RAxML  
67 (v.8.2.8) (11), using the general time-reversible model of sequence evolution and branch  
68 support values were inferred by bootstrapping the highest scoring maximum likelihood tree  
69 (1000 pseudoreplicates). *Mycobacterium canettii* (SRR011186) was used to root the  
70 phylogeny. The genomes were classified into main and sub lineages based on the presence of  
71 previously established markers (12). Average genetic distances between strains based on  
72 fixed single nucleotide polymorphisms (SNP) were calculated with the ape package (v.4.1)  
73 (13) for R (v.3.3.3) (14). Two strains were defined as clustered if their average genetic  
74 distance was  $\leq 12$  SNPs (15) and one strain was subsequently omitted from the analysis at  
75 random. Phylogenetic trees with associated metadata were visualized with the R package  
76 ggtree (v.1.6.11) (16).

#### 77 **WGS-based resistance profile inference**

78 The WGS data was screened for non-synonymous mutations and indels in genes known to be  
79 involved in drug resistance for the drugs assayed in *M. tuberculosis* (17, 18). Phylogenetic  
80 markers in drug resistance-associated genes (Table 2 – main text) shared by all strains  
81 belonging to a main- or sublineage (12, 19) (supplementary Table 1), as well as previously  
82 described phylogenetic markers (20), including main lineage markers derived from an  
83 unpublished collection of 400 phylogenetically diverse strains, were removed. After filtering  
84 for phylogenetic markers, all fixed non-synonymous polymorphisms in resistance-related  
85 genes were treated as linked to drug resistance. Where necessary, WGS results were  
86 complemented by molecular DST approaches as described previously (21).

#### 87 **Data availability**

88 The datasets generated and analysed in the study were deposited at the National Center  
89 National Center for Biotechnology Information (NCBI) under the BioProject IDs  
90 PRJNA454477 - <http://www.ncbi.nlm.nih.gov/bioproject/454477> and PRJNA300846 -  
91 <https://www.ncbi.nlm.nih.gov/bioproject/PRJNA300846>. Supplementary Table S3 provides a  
92 summary of sample identifiers and accession numbers and drug resistance information. The

93 quantitative readout of the 7H10 agar dilution-based DST and the results of the MGIT 960-  
 94 based testing at the WHO-defined critical concentration are available upon request.

95 **Supplementary Tables**

96 Supplementary Table S1 List of major phylogenetic markers in drug-resistance related genes

97

98

99

100

| Gene        | Rv number | Position | Ref NT | Alt NT | Codon change | Lineage | Coll (12) sublineage | Comments             |
|-------------|-----------|----------|--------|--------|--------------|---------|----------------------|----------------------|
| <i>embC</i> | Rv3793    | 4242182  | G      | T      | Ala774Ser    | L4      | L4.3.3               | Sublineage of L4.3.3 |
| <i>gid</i>  | Rv3919c   | 4407967  | T      | C      | Leu79Ser     | L4      | L4.1                 | Sublineage of L4.1   |

Supplementary Table S2 List of drug concentrations tested for MGIT 960 and 7H10 agar dilution for the training and test set. ND = not determined

| Antibiotic   | MGIT 960 concentrations (mg/L) Training set (n = 56) | MGIT 960 concentrations (mg/L) Test set (n = 120) | 7H10 agar dilution concentration ranges (mg/L), log <sub>2</sub> steps, Training set (n = 56) | 7H10 agar dilution concentration, ranges (mg/L), log <sub>2</sub> steps, Test set (n = 120) |
|--------------|------------------------------------------------------|---------------------------------------------------|-----------------------------------------------------------------------------------------------|---------------------------------------------------------------------------------------------|
| Ethionamide  | 1.25, 2.5, 5, 10, 25                                 | ND                                                | 0.25-128                                                                                      | 0.25-256                                                                                    |
| Ethambutol   | 1.25, 2.5, 5, 12.5, 50                               | 5                                                 | 0.5-64                                                                                        | 0.5-64                                                                                      |
| Capreomycin  | 2.5, 5, 25                                           | ND                                                | 0.5-64                                                                                        | 0.5-64                                                                                      |
| Streptomycin | 1, 4, 20                                             | ND                                                | 0.06-128                                                                                      | 0.06-128                                                                                    |
| Kanamycin A  | 1, 2, 4, 20                                          | ND                                                | 0.06-128                                                                                      | 0.06-128                                                                                    |
| Amikacin     | 1, 4, 20                                             | 1                                                 | 0.06 - 128                                                                                    | 0.06-128                                                                                    |
| Moxifloxacin | 0.25, 0.5, 2.5, 7.5                                  | 0.25                                              | 0.016-32                                                                                      | 0.016-32                                                                                    |
| Isoniazid    | 0.1, 1, 3, 10                                        | 0.1, 1                                            | 0.004-32                                                                                      | 0.004-32                                                                                    |
| Rifampin     | 1, 4, 20                                             | 1                                                 | 0.016-256                                                                                     | 0.016-256                                                                                   |
| Rifabutin    | 0.1, 0.4, 2                                          | ND                                                | 0.004-32                                                                                      | 0.004-32                                                                                    |
| Pyrazinamide | 100                                                  | 100                                               | ND                                                                                            | ND                                                                                          |

## 101 **Supplementary References**

- 102 1. Springer B, Lucke K, Calligaris-Maibach R, Ritter C, Bottger EC. 2009. Quantitative  
103 Drug Susceptibility Testing of Mycobacterium tuberculosis by Use of MGIT 960 and  
104 EpiCenter Instrumentation. *J Clin Microbiol* 47:1773–1780.
- 105 2. Ängeby K, Juréen P, Kahlmeter G, Hoffner S, Schön T. 2012. Challenging a dogma:  
106 antimicrobial susceptibility testing breakpoints for Mycobacterium tuberculosis. *Bull*  
107 *World Health Organ* 90:693–698.
- 108 3. Sirgel FA, Wiid IJF, van Helden PD. 2009. Measuring Minimum Inhibitory  
109 Concentrations in Mycobacteria, p. 173–186. *In* Parish T., BA (ed.), *Mycobacteria*  
110 *Protocols. Methods in Molecular Biology (Methods and Protocols)*. Humana Press,  
111 Totowa, NJ.
- 112 4. Comas I, Chakravarti J, Small PM, Galagan J, Niemann S, Kremer K, Ernst JD,  
113 Gagneux S. 2010. Human T cell epitopes of Mycobacterium tuberculosis are  
114 evolutionarily hyperconserved. *Nat Genet* 42:498–503.
- 115 5. Li H, Durbin R. 2009. Fast and accurate short read alignment with Burrows-Wheeler  
116 transform. *Bioinformatics* 25:1754–1760.
- 117 6. McKenna A, Hanna M, Banks E, Sivachenko A, Cibulskis K, Kernytsky A, Garimella  
118 K, Altshuler D, Gabriel S, Daly M, DePristo MA. 2010. The Genome Analysis  
119 Toolkit: A MapReduce framework for analyzing next-generation DNA sequencing  
120 data. *Genome Res* 20:1297–1303.
- 121 7. Li H, Handsaker B, Wysoker A, Fennell T, Ruan J, Homer N, Marth G, Abecasis G,  
122 Durbin R. 2009. The Sequence Alignment/Map format and SAMtools. *Bioinformatics*  
123 25:2078–2079.
- 124 8. Koboldt DC, Zhang Q, Larson DE, Shen D, McLellan MD, Lin L, Miller C a, Mardis  
125 ER, Ding L, Wilson RK. 2012. VarScan 2: Somatic mutation and copy number  
126 alteration discovery in cancer by exome sequencing. *Genome Res* 22:568–576.
- 127 9. Cingolani P, Platts A, Wang LL, Coon M, Nguyen T, Wang L, Land SJ, Lu X, Ruden  
128 DM. 2012. A program for annotating and predicting the effects of single nucleotide  
129 polymorphisms, SnpEff. *Fly (Austin)* 6:80–92.

- 130 10. Stucki D. 2015. Transmission and evolution of *Mycobacterium tuberculosis* studied by  
131 whole genome sequencing and single nucleotide polymorphism-typing.
- 132 11. Stamatakis A. 2014. RAxML version 8: a tool for phylogenetic analysis and post-  
133 analysis of large phylogenies. *Bioinformatics* 30:1312–1313.
- 134 12. Coll F, McNerney R, Guerra-Assunção JA, Glynn JR, Perdigão J, Viveiros M,  
135 Portugal I, Pain A, Martin N, Clark TG. 2014. A robust SNP barcode for typing  
136 *Mycobacterium tuberculosis* complex strains. *Nat Commun* 5:4812.
- 137 13. Paradis E, Claude J, Strimmer K. 2004. APE: Analyses of Phylogenetics and Evolution  
138 in R language. *Bioinformatics* 20:289–290.
- 139 14. R Core Team. 2013. R: A Language and Environment for Statistical Computing. R  
140 Foundation for Statistical Computing, Vienna, Austria.
- 141 15. Walker TM, Ip CL, Harrell RH, Evans JT, Kapatai G, Dedicoat MJ, Eyre DW, Wilson  
142 DJ, Hawkey PM, Crook DW, Parkhill J, Harris D, Walker AS, Bowden R, Monk P,  
143 Smith EG, Peto TE. 2013. Whole-genome sequencing to delineate *Mycobacterium*  
144 *tuberculosis* outbreaks: a retrospective observational study. *Lancet Infect Dis* 13:137–  
145 146.
- 146 16. Yu G, Smith DK, Zhu H, Guan Y, Lam TT-Y. 2017. ggtree: an R package for  
147 visualization and annotation of phylogenetic trees with their covariates and other  
148 associated data. *Methods Ecol Evol* 8:28–36.
- 149 17. Gygli SM, Borrell S, Trauner A, Gagneux S. 2017. Antimicrobial resistance in  
150 *Mycobacterium tuberculosis*: mechanistic and evolutionary perspectives. *FEMS*  
151 *Microbiol Rev* 41:354–373.
- 152 18. Safi H, Lingaraju S, Amin A, Kim S, Jones M, Holmes M, McNeil M, Peterson SN,  
153 Chatterjee D, Fleischmann R, Alland D. 2013. Evolution of high-level ethambutol-  
154 resistant tuberculosis through interacting mutations in decaprenylphosphoryl- $\beta$ -D-  
155 arabinose biosynthetic and utilization pathway genes. *Nat Genet* 45:1190–1197.
- 156 19. Stucki D, Brites D, Jeljeli L, Coscolla M, Liu Q, Trauner A, Fenner L, Rutaiwa L,  
157 Borrell S, Luo T, Gao Q, Kato-Maeda M, Ballif M, Egger M, Macedo R, Mardassi H,  
158 Moreno M, Tundo Vilanova G, Fyfe J, Globan M, Thomas J, Jamieson F, Guthrie JL,

- 159 Asante-Poku A, Yeboah-Manu D, Wampande E, Ssengooba W, Joloba M, Henry  
160 Boom W, Basu I, Bower J, Saraiva M, Vaconcellos SEG, Suffys P, Koch A,  
161 Wilkinson R, Gail-Bekker L, Malla B, Ley SD, Beck H-P, de Jong BC, Toit K,  
162 Sanchez-Padilla E, Bonnet M, Gil-Brusola A, Frank M, Penlap Beng VN, Eisenach K,  
163 Alani I, Wangui Ndung'u P, Revathi G, Gehre F, Akter S, Ntoumi F, Stewart-  
164 Isherwood L, Ntinginya NE, Rachow A, Hoelscher M, Cirillo DM, Skenders G,  
165 Hoffner S, Bakonyte D, Stakenas P, Diel R, Crudu V, Moldovan O, Al-Hajoj S, Otero  
166 L, Barletta F, Jane Carter E, Diero L, Supply P, Comas I, Niemann S, Gagneux S.  
167 2016. Mycobacterium tuberculosis lineage 4 comprises globally distributed and  
168 geographically restricted sublineages. *Nat Genet* 48:1535–1543.
- 169 20. Coll F, McNerney R, Preston MD, Guerra-Assunção JA, Warry A, Hill-Cawthorne G,  
170 Mallard K, Nair M, Miranda A, Alves A, Perdigão J, Viveiros M, Portugal I, Hasan Z,  
171 Hasan R, Glynn JR, Martin N, Pain A, Clark TG. 2015. Rapid determination of anti-  
172 tuberculosis drug resistance from whole-genome sequences. *Genome Med* 7:51.
- 173 21. Ritter C, Lucke K, Sirgel FA, Warren RW, van Helden PD, Bottger EC, Bloemberg G  
174 V. 2014. Evaluation of the AID TB Resistance Line Probe Assay for Rapid Detection  
175 of Genetic Alterations Associated with Drug Resistance in Mycobacterium  
176 tuberculosis Strains. *J Clin Microbiol* 52:940–946.
- 177

# Ethionamide (ETH)

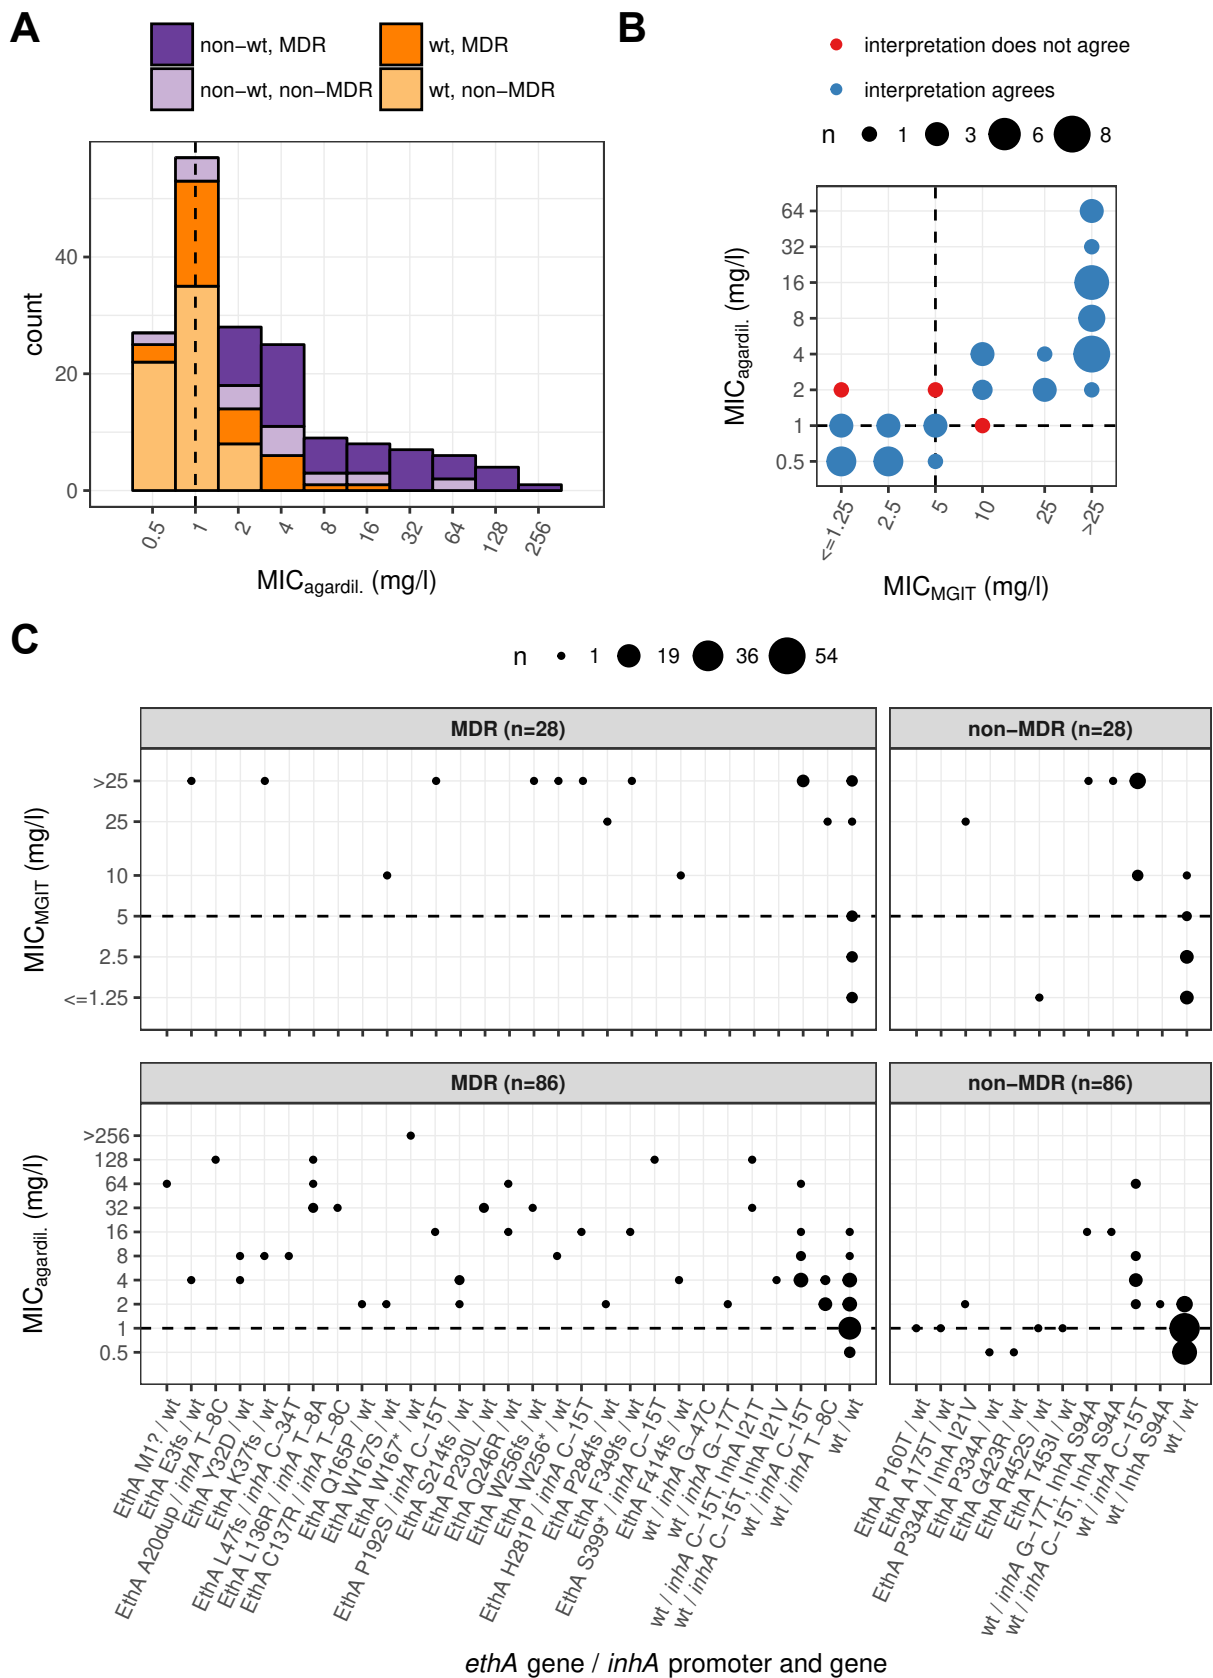

**Supplementary Figure S1 - A** Histogram of 7H10 agar dilution MICs for ethionamide resistance. **B** method agreement between phenotypic DST by MGIT 960 and 7H10 agar dilution. **C** MICs of *M. tuberculosis* strains harboring resistance mutations in target genes or for wt. Top panel MGIT 960, bottom panel 7H10 agar dilution. "M1?" indicates an initiator codon variant, "fs" indicates a frame shift variant, "\*" indicates a stop-gain variant. In all panels dashed lines indicate the ECOFF (see Table 1 in the main text).



# Ethambutol (EMB)

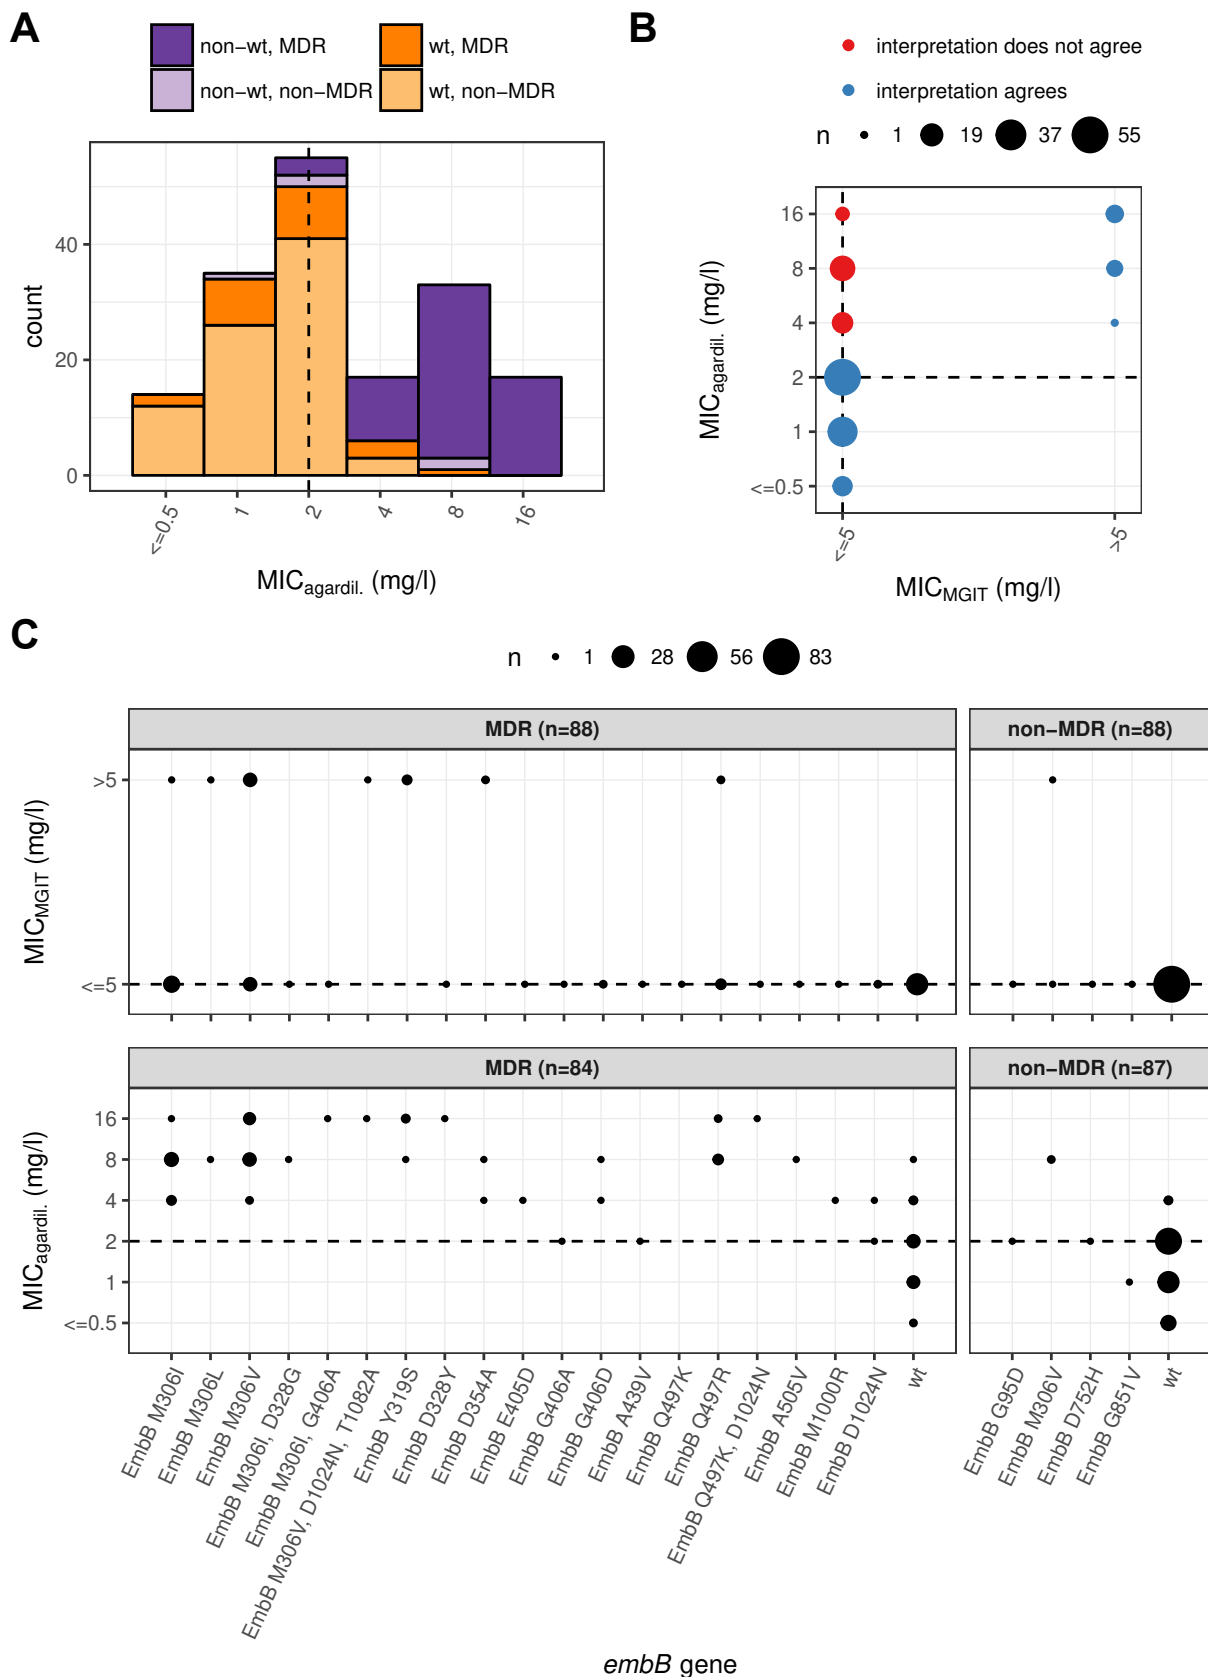

**Supplementary Figure S2 - A** Histogram of 7H10 agar dilution MICs for **ethambutol** resistance. **B** method agreement between phenotypic DST by MGIT 960 and 7H10 agar dilution. **C** MICs of *M. tuberculosis* strains harboring resistance mutations in target genes or for wt. Top panel MGIT 960, bottom panel 7H10 agar dilution. In all panels, dashed lines indicate the ECOFF (see Table 1 in the main text).

# Streptomycin (STR)

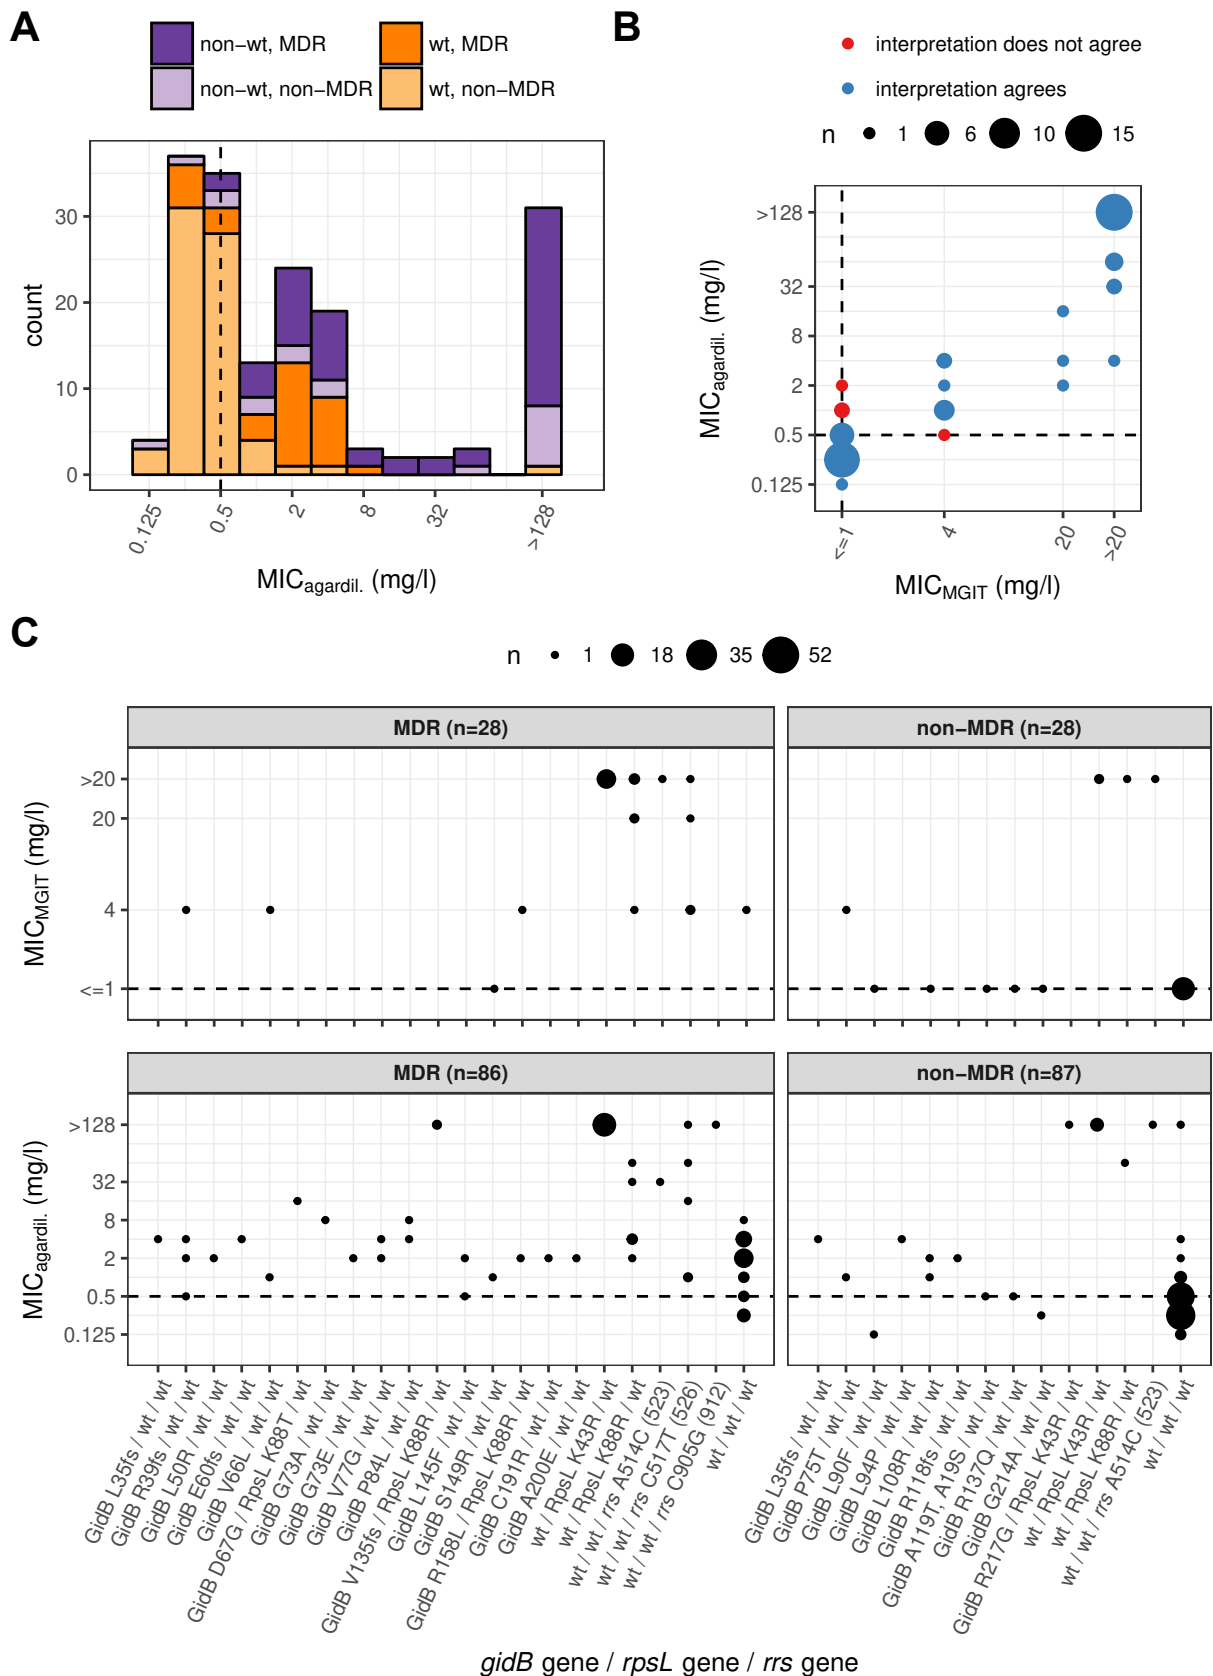

# Capreomycin (CAP)

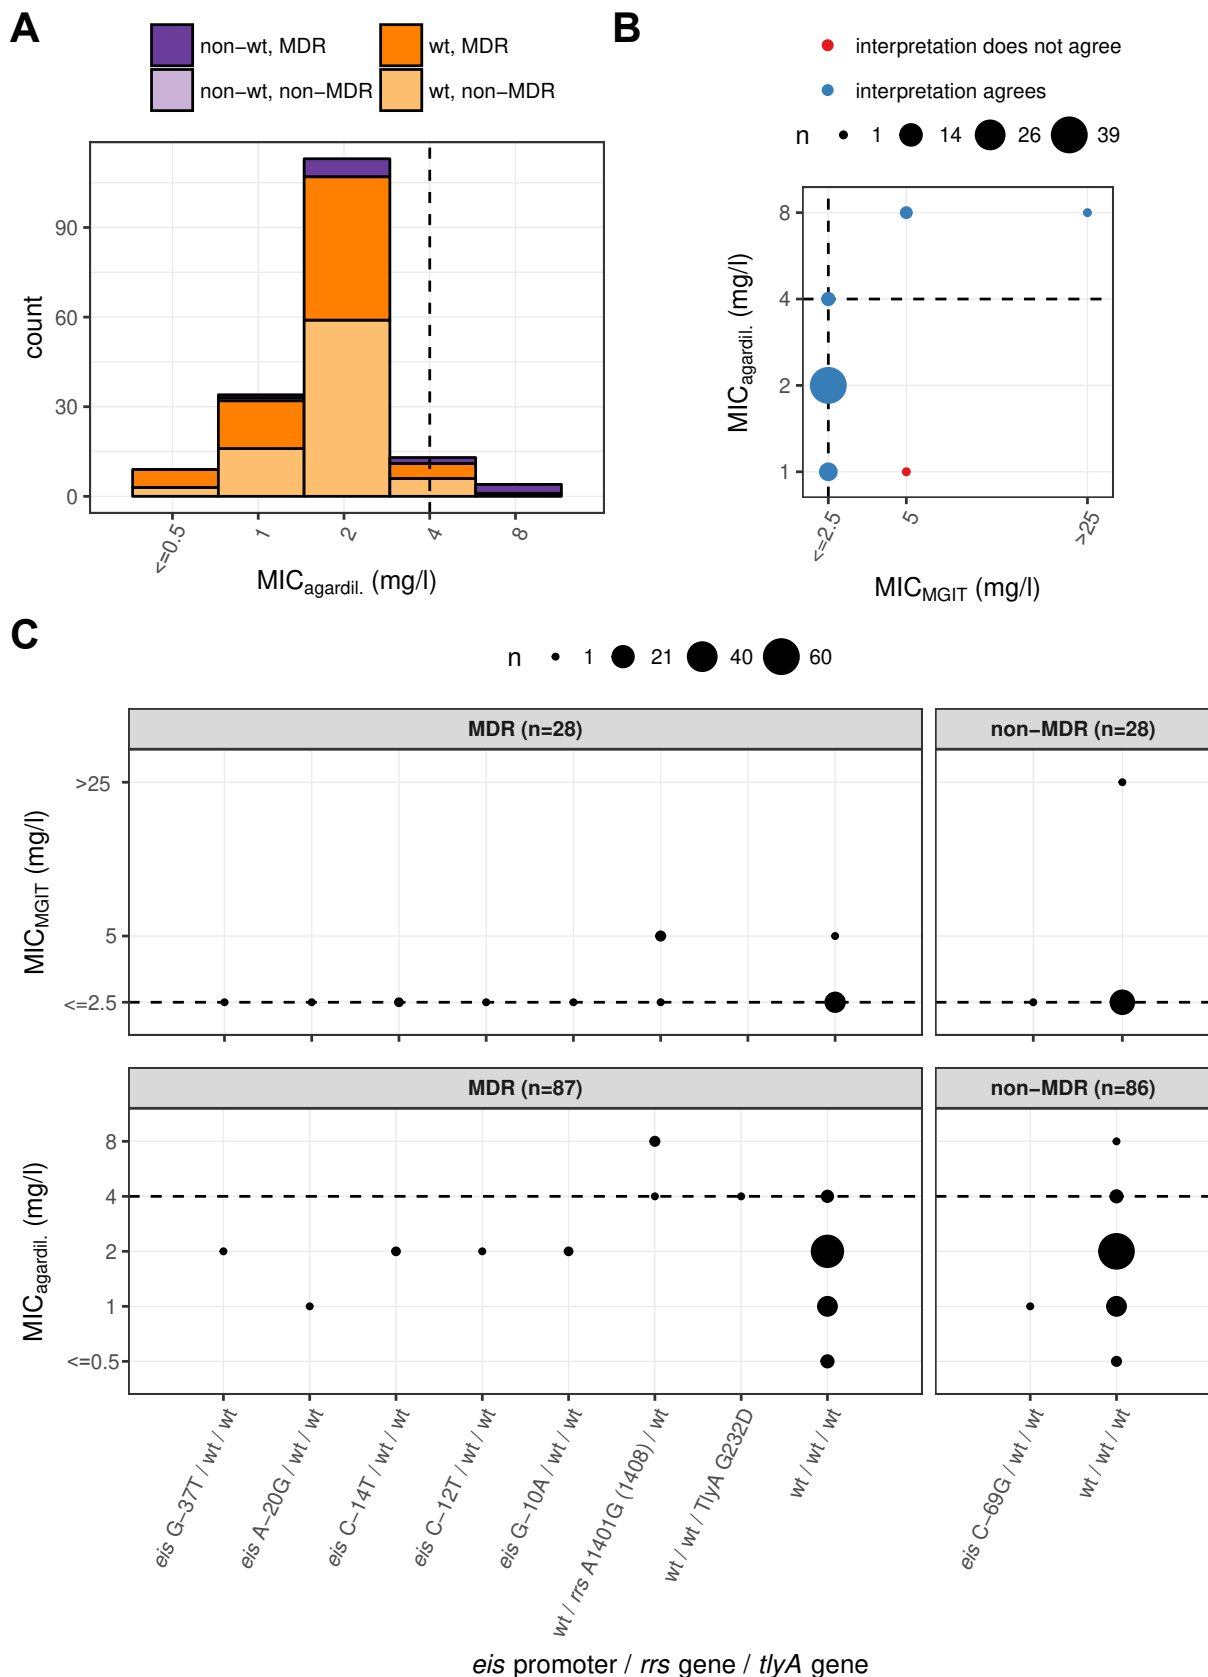

**Supplementary Figure S4 - A** Histogram of 7H10 agar dilution MICs for **capreomycin** resistance. **B** method agreement between phenotypic DST by MGIT 960 and 7H10 agar dilution. **C** MICs of *M. tuberculosis* strains harboring resistance mutations in target genes or for wt. Numbers in parentheses indicate the corresponding *Escherichia coli* nucleotide numbering. Top panel MGIT 960, bottom panel 7H10 agar dilution. In all panels, dashed lines indicate the ECOFF (see Table 1 in the main text).

# Kanamycin A (KAN)

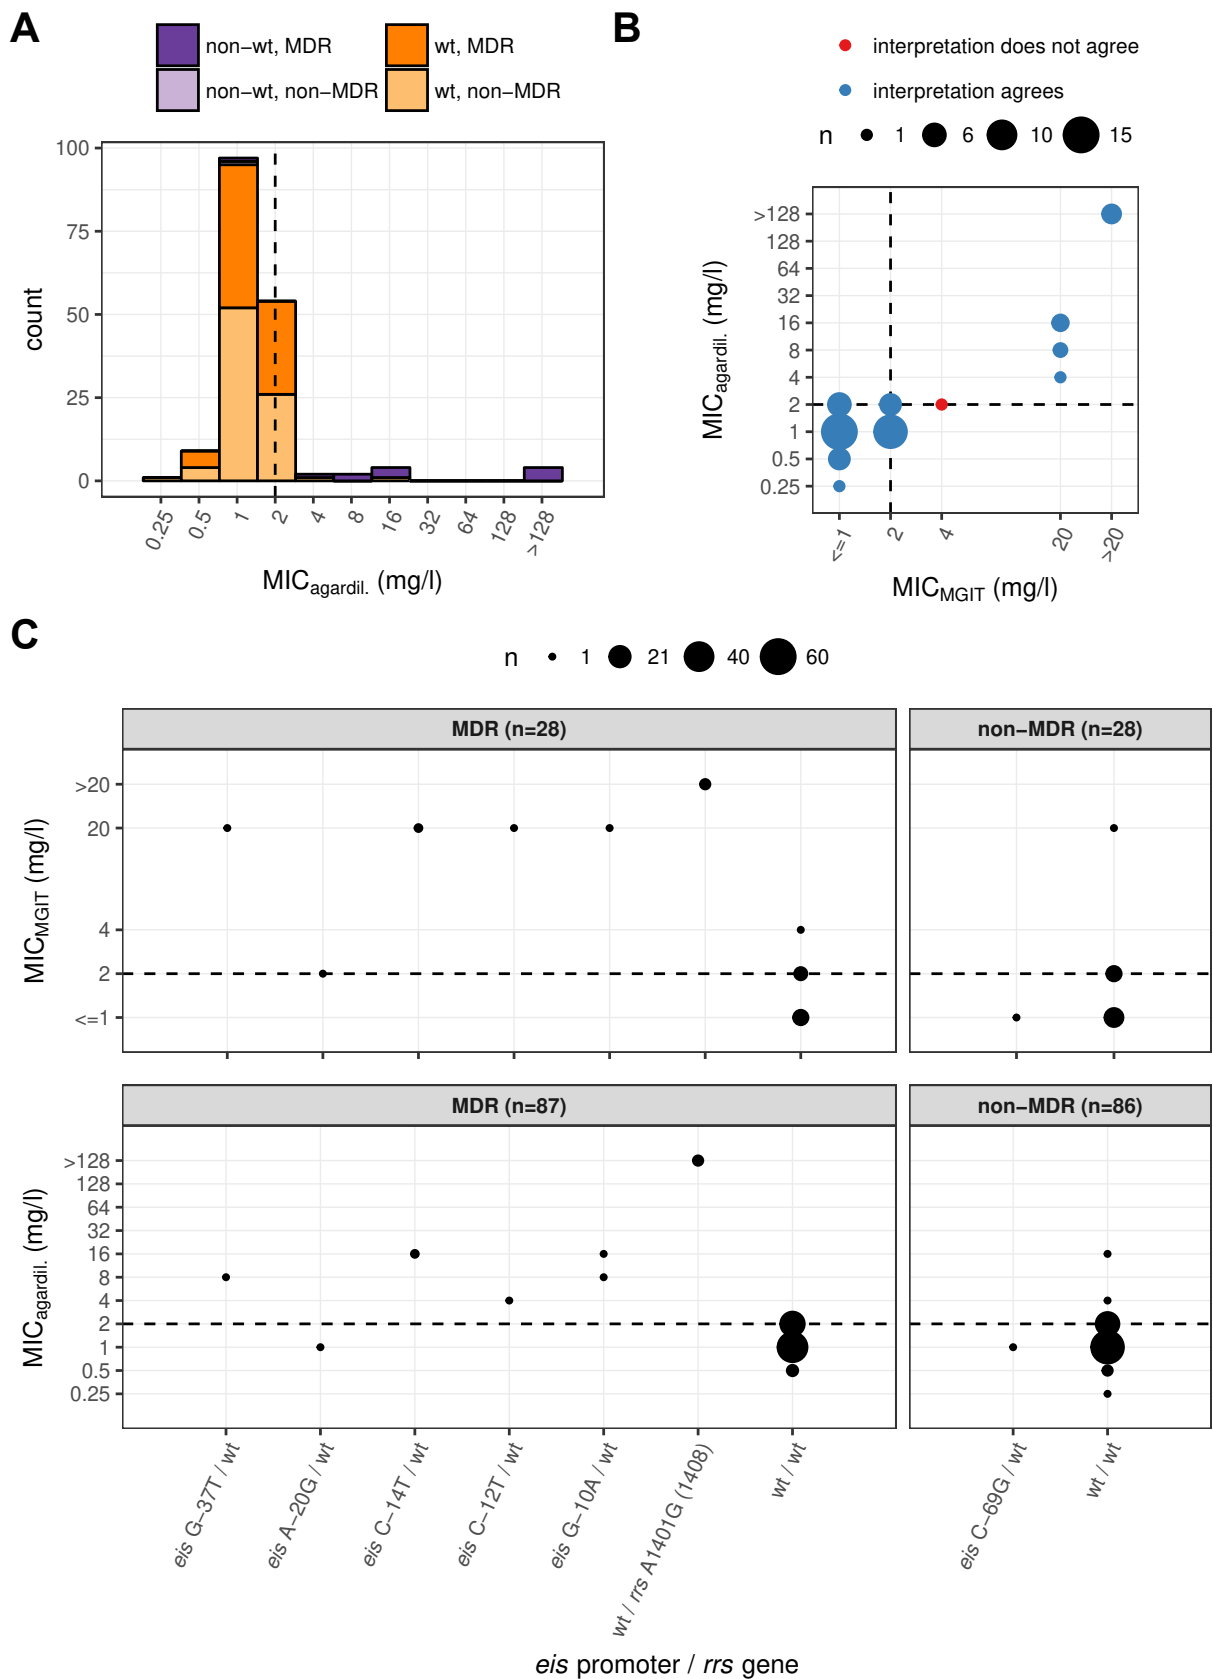

**Supplementary Figure S5 - A** Histogram of 7H10 agar dilution MICs for **kanamycin A** resistance. **B** method agreement between phenotypic DST by MGIT 960 and 7H10 agar dilution. **C** MICs of *M. tuberculosis* strains harboring resistance mutations in target genes or for wt. Numbers in parentheses indicate the corresponding *Escherichia coli* nucleotide numbering. Top panel MGIT 960, bottom panel 7H10 agar dilution. Numbers in parentheses indicate the corresponding *Escherichia coli* nucleotide number. In all panels, dashed lines indicate the ECOFF (see Table 1 in the main text).

# Amikacin (AM)

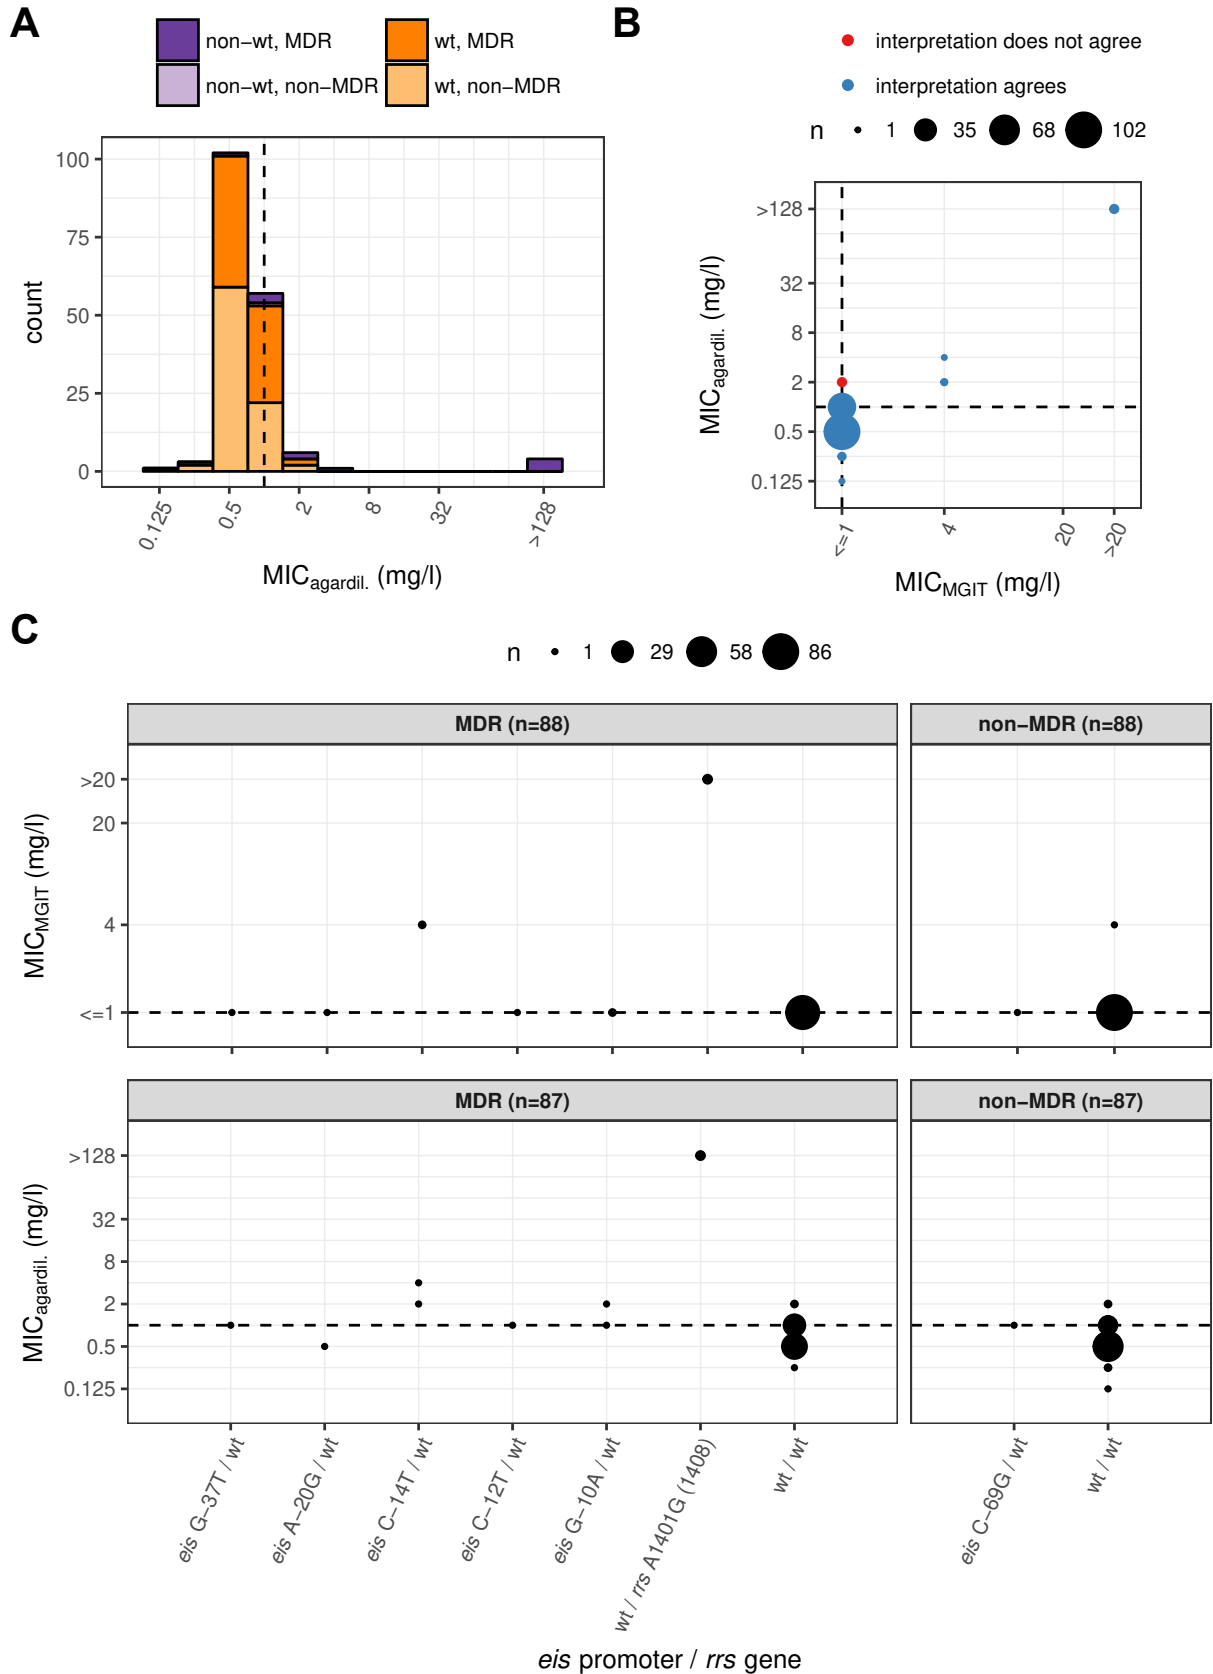

# Moxifloxacin (MOX)

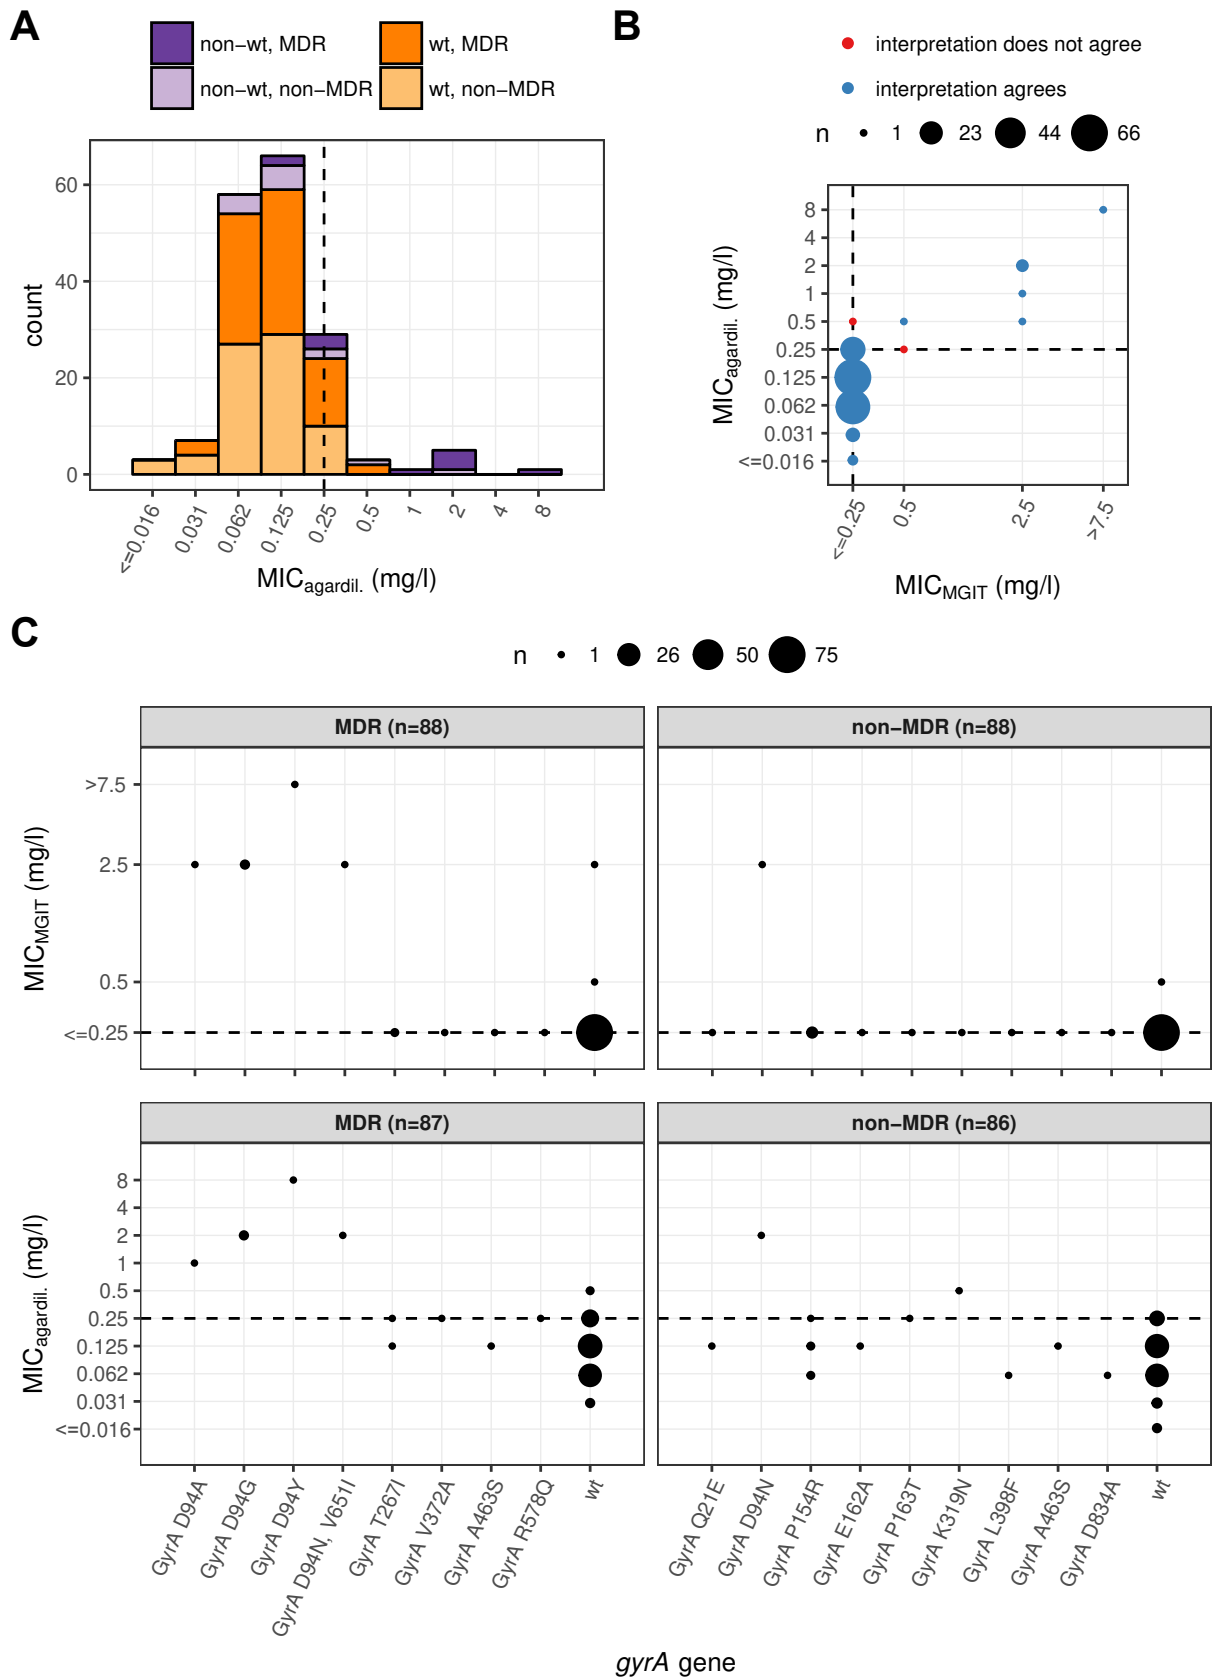

**Supplementary Figure S7 - A** Histogram of 7H10 agar dilution MICs for **moxifloxacin** resistance. **B** method agreement between phenotypic DST by MGIT 960 and 7H10 agar dilution. **C** MICs of *M. tuberculosis* strains harboring resistance mutations in target genes or for wt. Top panel MGIT 960, bottom panel 7H10 agar dilution. In all panels, dashed lines indicate the ECOFF (see Table 1 in the main text).

# Isoniazid (INH)

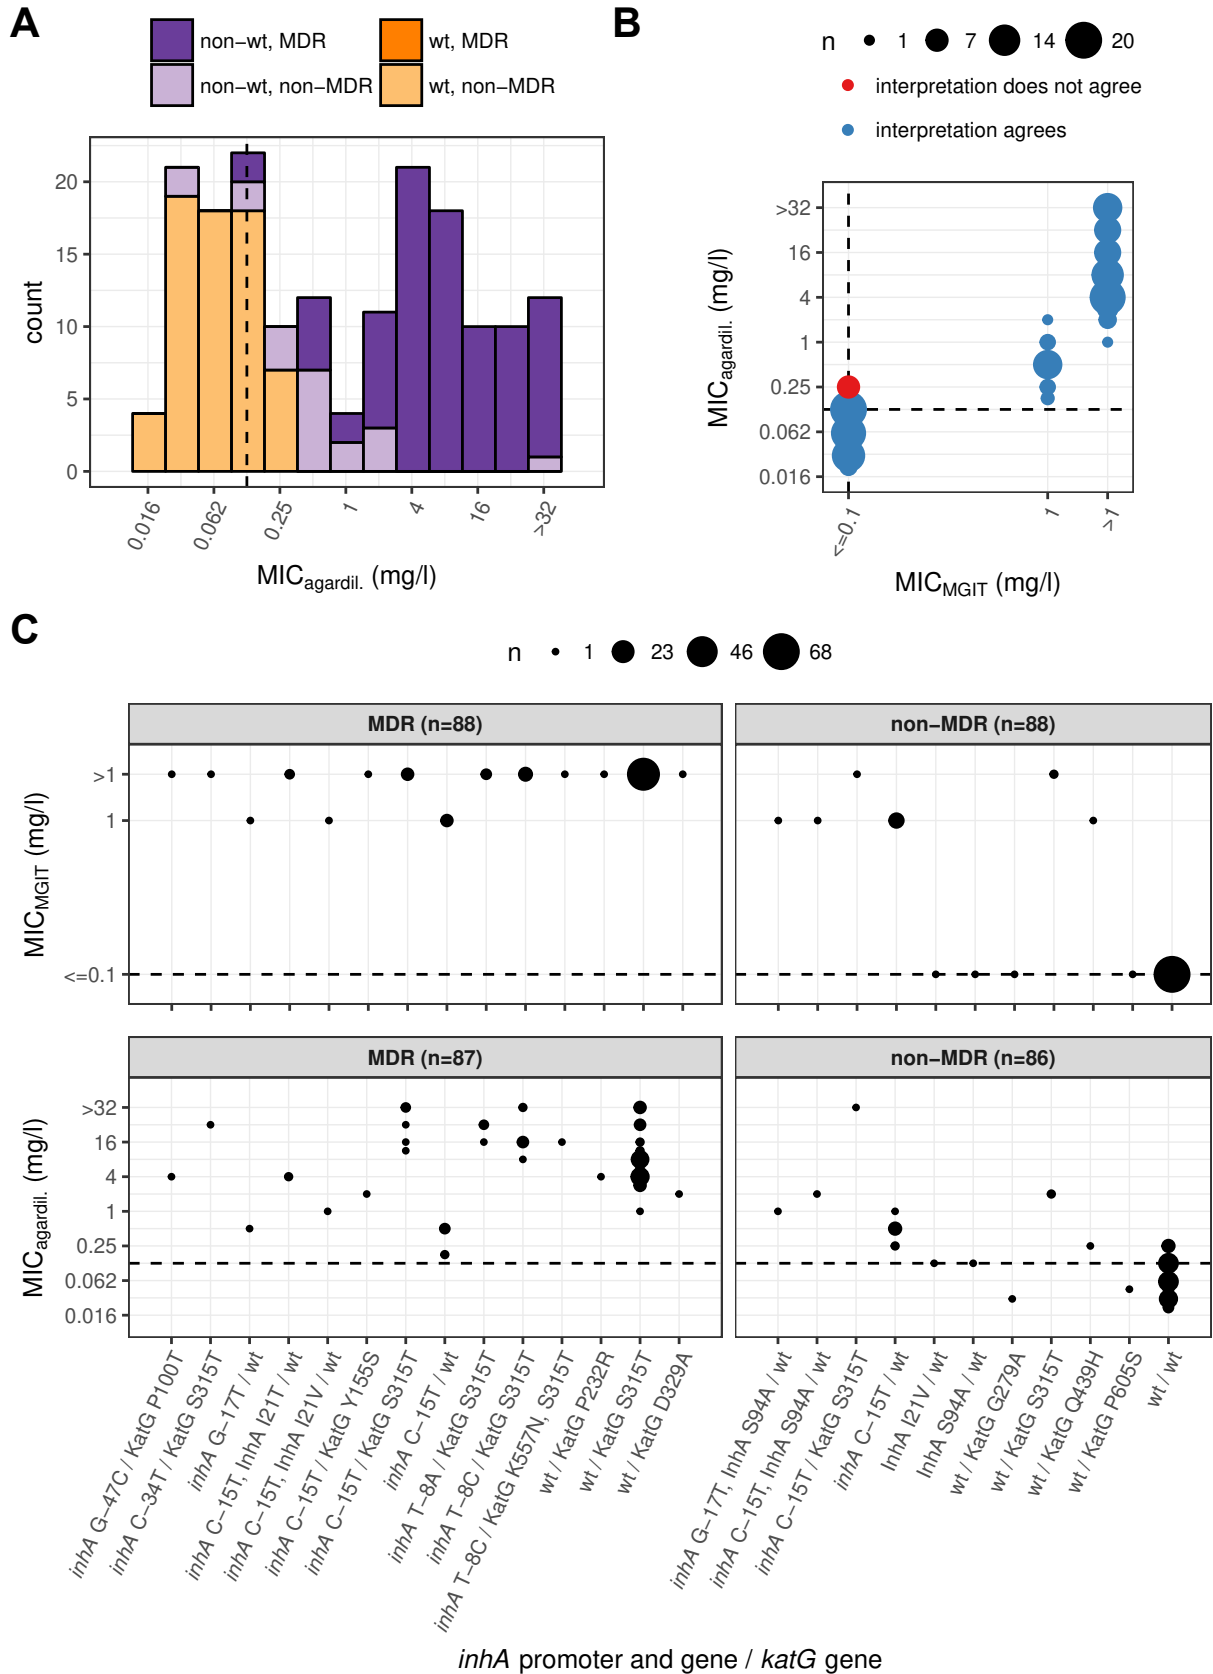

**Supplementary Figure S8 - A** Histogram of 7H10 agar dilution MICs for **isoniazid** resistance. **B** method agreement between phenotypic DST by MGIT 960 and 7H10 agar dilution. **C** MICs of *M. tuberculosis* strains harboring resistance mutations in target genes or for wt. Top panel MGIT 960, bottom panel 7H10 agar dilution. In all panels, dashed lines indicate the ECOFF (see Table 1 in the main text).

# Rifampin (RMP)

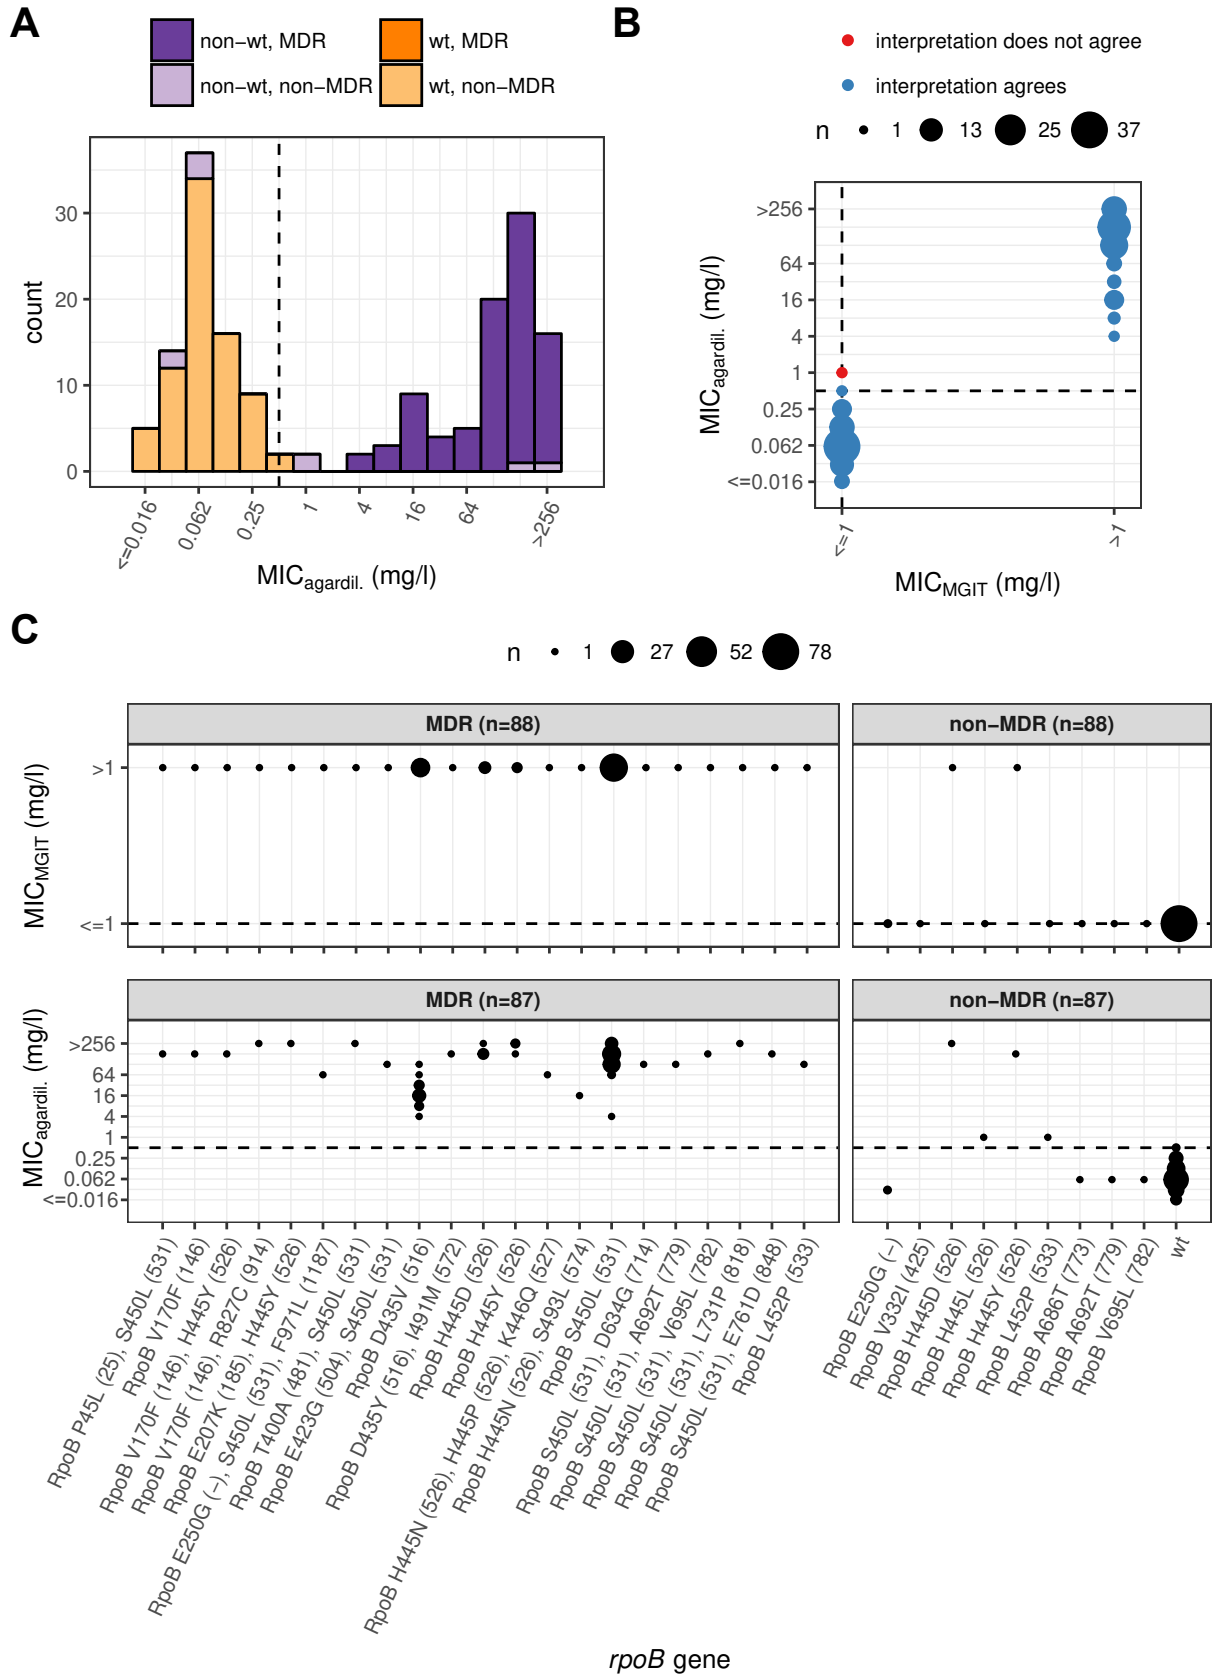

**Supplementary Figure S9 - A** Histogram of 7H10 agar dilution MICs for rifampin resistance. **B** method agreement between phenotypic DST by MGIT 960 and 7H10 agar dilution. **C** MICs of *M. tuberculosis* strains harboring resistance mutations in target genes or for wt. Top panel MGIT 960, bottom panel 7H10 agar dilution. Numbers in parentheses indicate the corresponding *Escherichia coli* codon numbers. In all panels, dashed lines indicate the ECOFF (see Table 1 in the main text).



# Rifabutin (RBT)

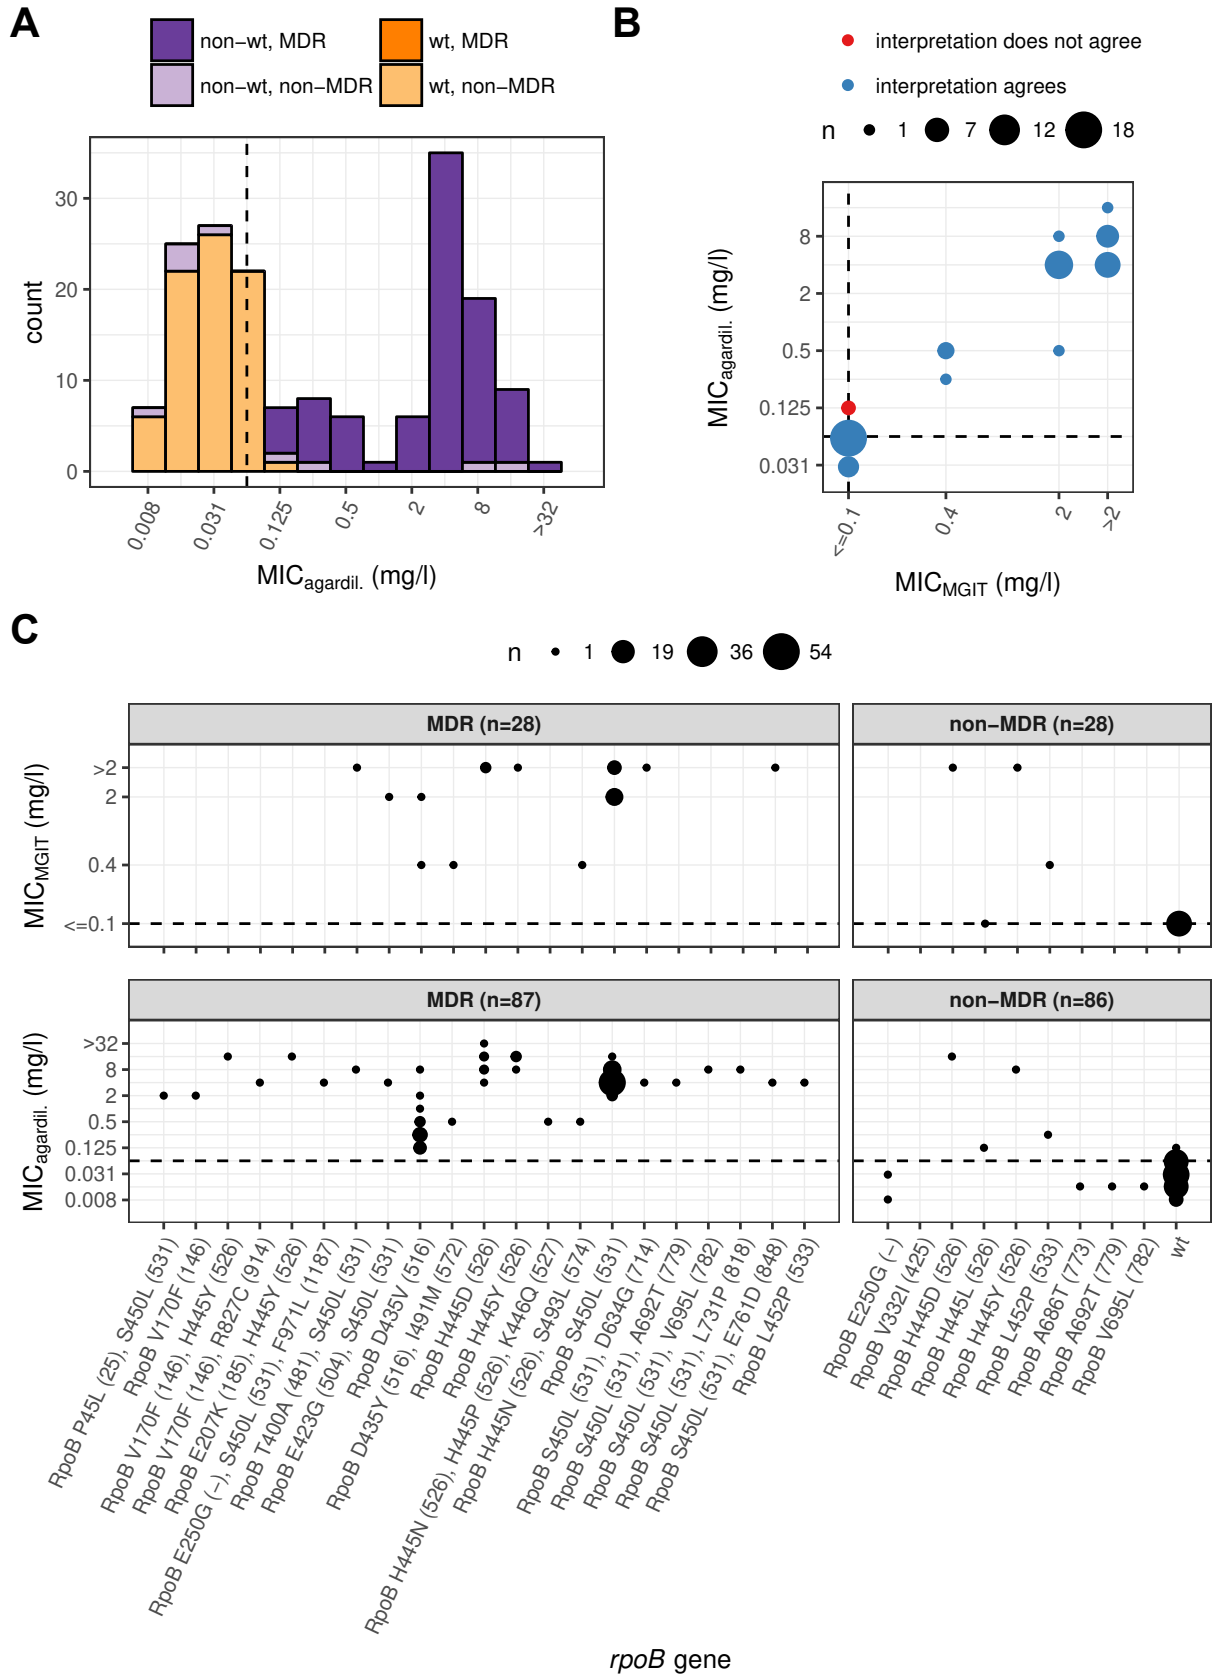

# Pyrazinamide (PZA)

A

n • 1 ● 30 ● 58 ● 87

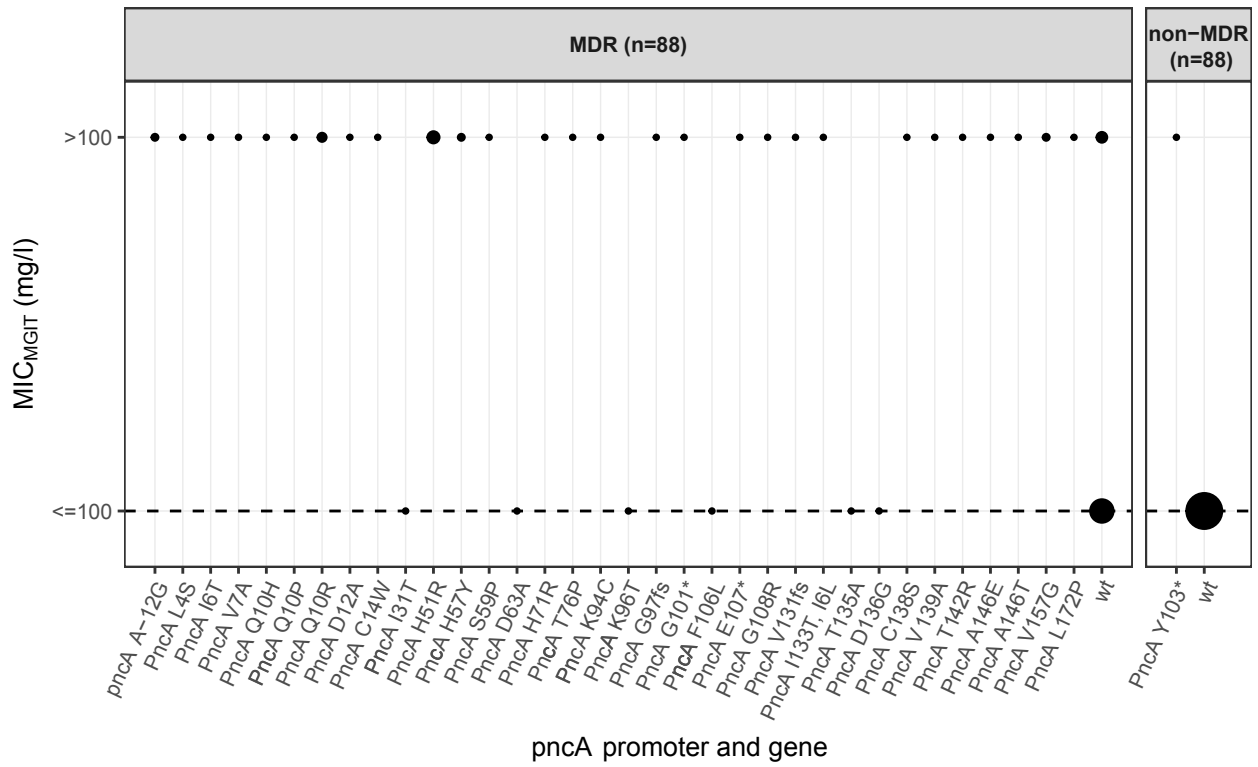

**Supplementary Figure S11 - A** MICs of *M. tuberculosis* strains harboring resistance mutations in the target gene for pyrazinamide resistance or for wt. Only results for MGIT 960 are available. "\*" indicates a stop-gain variant. Dashed line indicates the ECOFF (see Table 1 in the main text).
